# Supplementary material
Source: HighWire-hosted journal article supplement (https://jnm.snmjournals.org/highwire/filestream/102942/field_highwire_adjunct_files/0/260232_Supplemental_Data.pdf)
Supplement: 260232_Supplemental_Data.pdf [file 260232_Supplemental_Data.pdf]

**Supplemental table 1.** Patient characteristics stratified for disease setting

| <i>Patient characteristics</i>                    | <i>Primary PCa</i>  | <i>Recurrent PCa</i> | <i>mCRPC</i>        |
|---------------------------------------------------|---------------------|----------------------|---------------------|
| <i>N (% of total)</i>                             | 81/116 (70.0%)      | 25/116 (22.0%)       | 10/116 (8.0%)       |
| <i>Age (median + range, in yrs.)</i>              | 67.0 (49.0-77.0)    | 70.0 (51.0-84.0)     | 72.5 (61.0-79.0)    |
| <i>Weight (Kg)</i>                                | 84.0 (65.0-122.0)   | 82.0 (50.0-115.0)    | 83.5 (68.0-94.0)    |
| <i>Height (cm)</i>                                | 181.0 (155.0-194.0) | 178.0 (167.0-198.0)  | 177.5 (168.0-185.0) |
| <i>PSA (ng/mL)</i>                                | 11.1 (1.2-99.0)     | 5.0 (0.5-120.0)      | 7.7 (0.5-2790.0)    |
| <i>Gleason score (cum)</i>                        | 7 (6-9)             | 8 (6-9)              | 8 (6-9)             |
| <i>Treatment prior to PET/CT (N + % of total)</i> | 0/81 (0.0%)         | 25/25 (100.0%)       | 10/10 (100.0%)      |
| <i>RALP (N + % of total)</i>                      | -                   | 14/25 (56.0%)        | 0/10 (0.0%)         |
| <i>Chemotherapy and ADT (N + % of total)</i>      |                     |                      |                     |
|                                                   | ADT                 | 0/25 (0.0%)          | 7/10 (70.0%)        |
|                                                   | ADT + chemotherapy  | 3/25 (12.0%)         | 3/10 (30.0%)        |
| <i>Radiotherapy (N + % of total)</i>              | -                   | 8/25 (32.0%)         | 0/10 (0.0%)         |

% of total = percentage of total patients; yrs = years; Kg = Kilograms; cm = centimeters; ng/mL = nanogram per milliliter; cum = cumulative; RALP = Robot Assisted Laparoscopic Prostatectomy; ADT = Androgen Deprivation Therapy
